# Supplementary material
Source: PubMed Central journal article supplement (PMC4593993)
Supplement: Supp_Fig1.pdf [file Supp_Fig1.pdf]

## Supplementary Data

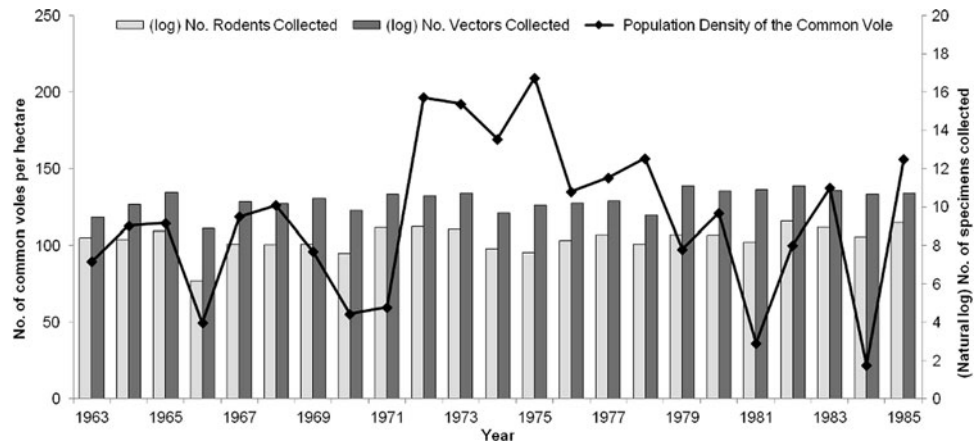

**SUPPLEMENTARY FIG. S1.** Population density of the common vole (*Microtus arvalis*) in the Samtshke-Javakheti region during 1963–1985 (black line). Grey bars show the natural log transformed totals of rodents collected (light grey) and vectors collected (dark grey) per year in the Samtshke-Javakheti region.
